# Supplementary material for: Casein Kinase 2 Mediates Degradation of Transcription Factor Pcf1 during Appressorium Formation in the Rice Blast Fungus
Source: MDPI journal article supplement (doi:10.3390/jof8020144), 2022-01-30
Supplement: s1 [file s1]

**Table S1. Primers used in this study**

| <b>Primer</b>          | <b>Sequence</b>                                                  |
|------------------------|------------------------------------------------------------------|
| <b>pKD8-GFP-Pcf1-F</b> | ATCACTCTCGGCATGGACGAGCTGTACAAGGGATCCACGCAGGAT<br>ACTGTAGAGTCCGG  |
| <b>pKD8-GFP-Pcf1-R</b> | CGTATCGTGATGGCGTGTCTGCTTACTGCAGGTCGACCACAATAGC<br>CCAATCCCGACTGA |
| <b>Pcf1-qrt-F</b>      | GAATGGGTGTTTGACTTGCAG                                            |
| <b>Pcf1-qrt-R</b>      | GCATCGGAGCTTGTGGTAG                                              |
| <b>Cka1-ADF</b>        | GCCATGGAGGCCAGTGAATTCATGCACAGCATGGCGCGCGTT                       |
| <b>Cka1-ADR</b>        | ATGCCCTCCCGGGTGGAATTCTCAAGCCGAGGTGTTGGTTCC                       |
| <b>Ckb1-ADF</b>        | GCCATGGAGGCCAGTGAATTCATGTCGACTTCGTCGGGAACG                       |
| <b>Ckb1-ADR</b>        | ATGCCCTCCCGGGTGGAATTCTCACAATCCGACTCTGCCCC                        |
| <b>Ckb2-ADF</b>        | GCCATGGAGGCCAGTGAATTCATGGAAGACTTTGGCAGCGAG                       |
| <b>Ckb2-ADR</b>        | ATGCCCTCCCGGGTGGAATTCTCAGACACCTTGCATCATGCT                       |
| <b>Pcf1-BDF</b>        | ATGGCCATGGAGGCCGAATTCATGACGCAGGATACTGTAGAG                       |
| <b>Pcf1-BDR</b>        | TCGACGGATCCCGGGGAATTCTTACACAATAGCCCAATCCCG                       |
| <b>3flag-Cka1F</b>     | GACGATGATGACAAGTCTAGAATGCACAGCATGGCGCGCGTT                       |
| <b>3flag-Cka1R</b>     | TTACTGCAGGTCGACTCTAGATCAAGCCGAGGTGTTGGTTCC                       |
| <b>3flag-Ckb1F</b>     | GACGATGATGACAAGTCTAGAATGTCGACTTCGTCGGGAACG                       |
| <b>3flag-Ckb1R</b>     | TTACTGCAGGTCGACTCTAGATCACAATCCGACTCTGCCCC                        |
| <b>3flag-Ckb2F</b>     | GACGATGATGACAAGTCTAGAATGGAAGACTTTGGCAGCGAG                       |
| <b>3flag-Ckb2R</b>     | TTACTGCAGGTCGACTCTAGATCAGACACCTTGCATCATGCT                       |
| <b>3flag-Pcf1F</b>     | GACGATGATGACAAGTCTAGAATGACGCAGGATACTGTAGAG                       |
| <b>3flag-Pcf1R</b>     | TTACTGCAGGTCGACTCTAGATTACACAATAGCCCAATCCCG                       |
